# Supplementary material
Source: MDPI journal article supplement (https://www.mdpi.com/2311-5637/8/8/388)
Supplement: s1 [file s1]

Table S1. Diversity index of fungus in spontaneous fermentation of KFP

| Samples | Coverage | Shannon index | Simpson index | Sobs index | Ace index | Chao1 index |
|---------|----------|---------------|---------------|------------|-----------|-------------|
| SF1     | 1.00     | 0.89          | 0.53          | 57.67      | 54.58     | 50.69       |
| SF3     | 1.00     | 1.76          | 0.25          | 56         | 67.66     | 63.33       |
| SF5     | 1.00     | 1.67          | 0.33          | 41.33      | 59.10     | 58.02       |
| SF15    | 1.00     | 0.39          | 0.87          | 36         | 42.07     | 40.58       |

Table S2 Yeast identification by comparing 26S rDNA D1/D2 domain sequences

| Isolate No. | Picture No. | Morphotype             | D1/<br>sequence/(identity %)/accession number | D2<br>domain         | of | 26S<br>rDNA        |
|-------------|-------------|------------------------|-----------------------------------------------|----------------------|----|--------------------|
| 1           | A           | <i>Metschnikowia</i>   | <i>Metschnikowia</i>                          | <i>sinensis</i>      |    | /99.01%/MN123984.1 |
| 2           | B           | <i>Wickerhamomyces</i> | <i>Wickerhamomyces</i>                        | <i>anomalus</i>      |    | /100%/MG773362.1   |
| 3           | C           | <i>Hanseniaspora</i>   | <i>Hanseniaspora</i>                          | <i>gulliermondii</i> |    | /100%/KJ794696.1   |
| 4           | D           | -                      | <i>Torulaspora</i>                            | <i>delbrueckii</i>   |    | /99.66%/MN337239.1 |
| 5           | E           | <i>Pichia</i>          | <i>Pichia kluyveri</i>                        |                      |    | /99.48%/KT156709.1 |

Table S3 The OAV of the main aromatic compounds in KFP wine

| No | Compounds       | CAS      | Odour<br>descriptor        | Odour<br>threshold<br>(mg/L) | Groups |        |       |       |       |       |
|----|-----------------|----------|----------------------------|------------------------------|--------|--------|-------|-------|-------|-------|
|    |                 |          |                            |                              | X16    | K4     | K14   | K19   | K21   | K26   |
| A  | Ethyl acetate   | 141-78-6 | Fruity,<br>sweet           | 15                           | 1.12   | 1.25   | 1.08  | 1.8   | 1.13  | 1.83  |
| B  | Ethyl butyrate  | 105-54-4 | Sweet,<br>fruity           | 0.6                          | 1.60   | 1.67   | 0.88  | ND    | ND    | 0.87  |
| C  | Ethyl octanoate | 106-32-1 | Sweet,<br>musty,<br>fruity | 0.6                          | 49.57  | 103.82 | 29.83 | 34.37 | 28.20 | 33.95 |
| D  | Ethyl caprate   | 110-38-3 | Sweet,<br>fruity           | 0.2                          | 456.6  | 336.05 | 75.55 | 88.04 | 15.26 | 164   |
| E  | Ethyl laurate   | 106-33-2 | Sweet,<br>waxy,<br>floral  | 0.5                          | 3.34   | 25.26  | 0.74  | 4.78  | 0.4   | 0.66  |

|   |                      |           |                                 |       |       |       |       |       |        |       |
|---|----------------------|-----------|---------------------------------|-------|-------|-------|-------|-------|--------|-------|
|   |                      |           | nuance                          |       |       |       |       |       |        |       |
| F | Ethyl hexanoate      | 123-66-0  | Sweet,<br>fruity,<br>pineapple  | 0.01  | 2091  | 1912  | 524   | 472   | 316    | 604   |
| G | Ethyl propionate     | 105-37-3  | Sweet,<br>fruity                | 2.1   | ND    | ND    | 0.09  | ND    | ND     | ND    |
| H | Hexyl acetate        | 142-92-7  | Fruity,<br>green                | 1     | 1.25  | 0.27  | 0.11  | 0.41  | 0.94   | ND    |
| I | Isobutyl acetate     | 110-19-0  | Sweet,<br>fruity                | 3.4   | 0.02  | 0.1   | ND    | ND    | 0.04   | 0.005 |
| J | Isoamyl acetate      | 123-92-2  | Sweet,<br>fruity,<br>banana     | 0.03  | ND    | ND    | ND    | ND    | 160    | ND    |
| K | Phenethyl acetate    | 103-45-7  | Sweet,<br>honey,<br>floral rosy | 0.25  | ND    | ND    | ND    | 4.24  | 118.64 | ND    |
| L | (R,R)-2,3-Butanediol | 24347-58- | Buttery,                        | 0.095 | 146.2 | 37.58 | 39.05 | 35.68 | 17.68  | 77.16 |

|   |            |          |                                  |      |         |         |        |        |       |        |
|---|------------|----------|----------------------------------|------|---------|---------|--------|--------|-------|--------|
|   |            | 8        | Creamy,<br>Fruity                |      |         |         |        |        |       |        |
| M | 1-Hexanol  | 111-27-3 | Pungent,<br>fruity,<br>alcoholic | 8    | 0.78    | 0.67    | 0.47   | 0.08   | 0.44  | 0.31   |
| N | Isoamylol  | 123-51-3 | Alcoholic,<br>fruity             | 40   | 0.45    | 0.39    | 0.06   | 0.14   | 0.58  | 0.14   |
| O | Isobutanol | 78-83-1  | fusel<br>whiskey                 | 82   | 0.20    | 0.25    | 0.08   | 0.10   | 0.08  | 0.15   |
| P | 1-Nonanol  | 143-08-8 | Fatty,<br>flowery<br>citrus,     | 0.05 | 41.2    | 8.6     | 4.6    | 60.2   | 18.2  | 63     |
| Q | 1-Octanol  | 111-87-5 | Waxy,<br>green,<br>fatty         | 10   | 0.52    | 0.53    | 0.02   | 0.44   | 0.03  | 0.36   |
| R | 1-Pentanol | 71-41-0  | Fermente<br>d, bready,<br>fusel  | 0.15 | 1163.93 | 1291.47 | 626.47 | 593.67 | 423.8 | 685.53 |

|   |                   |          |                      |     |       |       |       |       |        |       |
|---|-------------------|----------|----------------------|-----|-------|-------|-------|-------|--------|-------|
| S | Phenethyl alcohol | 60-12-8  | Sweet,<br>floral     | 14  | 1.33  | 1.58  | 0.79  | 17.57 | 0.78   | 0.90  |
| T | 1-Propanol        | 71-23-8  | Fusel,<br>alcoholic  | 314 | 0.003 | 0.004 | 0.001 | 0.003 | 0.0005 | 0.003 |
| U | Acetic acid       | 64-19-7  | Vinegar              | 300 | 0.02  | 0.009 | 0.02  | 0.02  | 0.03   | 0.05  |
| V | Octanoic acid     | 124-07-2 | Vegetable,<br>cheesy | 10  | 0.40  | 0.01  | 0.41  | 0.36  | 0.06   | 0.34  |

Note: ND represents a compound that is not detected; OAV: odor activity value.
